# Supplementary material for: Cancer mortality trends in an industrial district of Shanghai, China, from 1974 to 2014, and projections to 2029
Source: PubMed Central journal article supplement (PMC5696197; doi:10.18632/oncotarget.21419), 2017-09-30
Supplement: oncotarget-08-92470-s001.pdf [file oncotarget-08-92470-s001.pdf]

## Cancer mortality trends in an industrial district of Shanghai, China, from 1974 to 2014, and projections to 2029

### SUPPLEMENTARY MATERIALS

**Supplementary Table 1: Difference in crude mortality rate of each cancer type between men and women during 1974-2014**

| Cancer sites          | Crude mortality rate in men (/10 <sup>5</sup> ) | Crude mortality rate in women (/10 <sup>5</sup> ) | Ratio (Men/women) | Statistical tests <sup>a</sup> |
|-----------------------|-------------------------------------------------|---------------------------------------------------|-------------------|--------------------------------|
| Lip, Oral & pharynx   | 1.57                                            | 0.89                                              | 1.76              | u=6.20, p<0.001                |
| Nasopharynx           | 3.25                                            | 1.32                                              | 2.46              | u=12.75, p<0.001               |
| Esophagus             | 14.15                                           | 6.9                                               | 2.05              | u=22.48, p<0.001               |
| Stomach               | 40.16                                           | 22.9                                              | 1.75              | u=31.11, p<0.001               |
| Colorectum            | 17.97                                           | 16.57                                             | 1.08              | u=3.40, p<0.001                |
| Liver                 | 33.14                                           | 13.26                                             | 2.50              | u=41.58, p<0.001               |
| Gallbladder           | 3.58                                            | 6.76                                              | 0.53              | u=-41.12, p<0.001              |
| Pancreas              | 9.39                                            | 8.81                                              | 1.07              | u=1.94, p=0.052                |
| Larynx                | 1.87                                            | 0.29                                              | 6.45              | u=15.18, p<0.001               |
| Lung                  | 62.67                                           | 27.33                                             | 2.29              | u=53.37, p<0.001               |
| Other thoracic organs | 0.98                                            | 0.66                                              | 1.48              | u=3.64, p<0.001                |
| Bone                  | 2.19                                            | 1.89                                              | 1.16              | u=2.10, p=0.036                |
| Melanoma of the skin  | 0.32                                            | 0.37                                              | 0.86              | u=-0.95, p=0.342               |
| Kidney                | 2.46                                            | 1.6                                               | 1.54              | u=6.05, p<0.001                |
| Bladder               | 4.28                                            | 1.63                                              | 2.63              | u=15.45, p<0.001               |
| Brain, CNS            | 4.58                                            | 4.09                                              | 1.12              | u=2.41, p=0.016                |
| Thyroid               | 0.35                                            | 0.79                                              | 0.44              | u=-5.87, p<0.001               |
| Lymphoma              | 5.61                                            | 4.16                                              | 1.35              | u=6.65, p<0.001                |
| Leukemia              | 4.69                                            | 4.22                                              | 1.11              | u=2.25, p=0.025                |
| others                | 11.04                                           | 11.14                                             | 0.99              | u=-0.31, p=0.760               |

<sup>a</sup>u value was calculated according to Poisson distribution.

**Supplementary Table 2: Trends in the crude mortality rate of each cancer type during 1974-1984, 1985-1994, 1995-2004, and 2005-2014**

See Supplementary File 1

**Supplementary Table 3: Trends in age-standardized mortality rates stratified by sex during 1974-2014**

See Supplementary File 2

**Supplementary Table 4: The concordance of predicted number with actual number of cancer death during 2010-2014**

| Age group | Actual cases <sup>a</sup> | Predicted cases <sup>a</sup> |
|-----------|---------------------------|------------------------------|
| 1-4       | 9                         | 14.34                        |
| 5-9       | 4                         | 4.23                         |
| 10-14     | 5                         | 8.11                         |
| 15-19     | 12                        | 9.09                         |
| 20-24     | 29                        | 21.96                        |
| 25-29     | 27                        | 36.72                        |
| 30-34     | 38                        | 43.35                        |
| 35-39     | 60                        | 78.98                        |
| 40-44     | 114                       | 136.10                       |
| 45-49     | 273                       | 266.73                       |
| 50-54     | 860                       | 836.26                       |
| 55-59     | 1493                      | 1518.96                      |
| 60-64     | 1473                      | 1584.43                      |
| 65-69     | 1110                      | 1217.56                      |
| 70-74     | 1295                      | 1317.31                      |
| 75-79     | 2378                      | 2315.62                      |
| 80-84     | 2604                      | 2472.52                      |
| 85-       | 2151                      | 1797.25                      |

<sup>a</sup>Difference was not significant ( $\chi^2=0.01$ ,  $P= 0.971$ ).

**Supplementary Table 5: Projected number of cancer death during 2015-2019, 2020-2024, and 2025-2029 by sex**

See Supplementary File 3
